# Supplementary material for: Approaches for supporting adolescents’ reading motivation: existing research and future priorities
Source: Frontiers journal article supplement (doi:10.3389/feduc.2023.1254048), 2023-09-07
Supplement: Data_Sheet_1.docx [file Data_Sheet_1.docx]

# Supplementary Material

Step 1: Search terms.

## SCOPUS

An initial search of peer-reviewed publications in SCOPUS was conducted. Set 1 search terms ‘reading’ OR ‘books’ were paired with set 2 ‘intervention’ OR ‘training’ OR ‘program*’, set 3 ‘motivation’ OR ‘interest’ OR ‘interest’ OR ‘attitude’ OR ‘engagement’ OR ‘self-efficacy’, and set 4 ‘teenage’ OR ‘adolescen*’ OR ‘secondary’ AND ‘school’ OR ‘high’ AND ‘school’.

## Education Resources Information Center (ERIC)

In order to capture resources published outside of academic journals (e.g., research reports, program evaluations, policy documents), a search of the ERIC database was conducted. Search terms entered were ‘reading’ and ‘program* and ‘motivation’ and ‘adolescen*’.

## What Works Clearinghouse

The Institute of Education Sciences (IES) What Works Clearinghouse (WWC) is a source of scientifically evaluated education programs, products, practices and policies and synthesizes research adhering to a rigorous set of standards (WWC, 2018). The site contains over 10,000 studies for which it provides summaries, reviews and practice guides. A search of the site was conducted in order to capture programs or products which have not had evaluations published in academic journals. Search terms restricted results to “literacy” interventions implemented with students from grades 7 (11 – 12 years old) to 11 (16 – 17 years old).
